# Supplementary material for: The Lifestyle of the Segmented Filamentous Bacterium: A Non-Culturable Gut-Associated Immunostimulating Microbe Inferred by Whole-Genome Sequencing
Source: PubMed Central journal article supplement — DNA Res. 2011 Jul 26;18(4):291–303. doi: 10.1093/dnares/dsr022 (PMC3158464; doi:10.1093/dnares/dsr022), 2011-07-26
Supplement: supp_dsr022_dsr022supp_tables.pdf [file supp_dsr022_dsr022supp_tables.pdf]

**Table S1.** Summary of the best BLASTP hits at order level for SFB proteins

| <b>Order</b>                  | <b>Number of gene</b> |
|-------------------------------|-----------------------|
| <i>Clostridiales</i>          | 987                   |
| <i>Bacillales</i>             | 55                    |
| <i>Erysipelotrichales</i>     | 50                    |
| <i>Fusobacteriales</i>        | 33                    |
| <i>Lactobacillales</i>        | 27                    |
| <i>Thermoanaerobacterales</i> | 15                    |
| <i>Selenomonadales</i>        | 8                     |
| <i>Prochlorales</i>           | 6                     |
| <i>Thermotogales</i>          | 5                     |
| others                        | 55                    |
| No hit                        | 250                   |
| Total                         | 1,491                 |

Table S2. Putative transport activities in SFB

| Gene ID                   | Annotation                                                               | Pfam      |              |
|---------------------------|--------------------------------------------------------------------------|-----------|--------------|
|                           |                                                                          | ID number | Family       |
| <b>1. ABC transporter</b> |                                                                          |           |              |
| SFBM_0171                 | antimicrobial peptide ABC transporter protein                            | PF00005   | ABC_tran     |
| SFBM_0172                 | ABC transporter permease protein                                         | PF02687   | FtsX         |
| SFBM_0174                 | ABC transporter, permease                                                | no motif  |              |
| SFBM_0179                 | amino acid ABC transporter, ATP-binding protein                          | PF00005   | ABC_tran     |
| SFBM_0180                 | amino acid ABC transporter, inner membrane subunit                       | PF00528   | BPD_transp_1 |
| SFBM_0181                 | amino acid ABC transporter, amino acid-binding protein                   | PF00497   | SBP_bac_3    |
| SFBM_0283                 | ABC transporter ATP-binding protein                                      | PF00005   | ABC_tran     |
| SFBM_0291                 | ABC-type iron (III) transport system, ATPase component                   | PF00005   | ABC_tran     |
| SFBM_0292                 | ABC transporter, substrate-binding protein                               | PF01297   | SBP_bac_9    |
| SFBM_0359                 | iron compound ABC transporter, iron-binding protein                      | PF01497   | Peripla_BP_2 |
| SFBM_0360                 | iron compound ABC transporter, periplasmic iron compound-binding protein | PF01032   | FecCD        |
| SFBM_0361                 | iron compound ABC transporter, ATP-binding protein                       | PF00005   | ABC_tran     |
| SFBM_0399                 | ABC transporter, ATP-binding protein                                     | PF00005   | ABC_tran     |
| SFBM_0400                 | ABC transporter permease protein                                         | PF02687   | FtsX         |
| SFBM_0445                 | oligopeptide ABC transporter, permease protein                           | PF00528   | BPD_transp_1 |
| SFBM_0446                 | oligopeptide ABC transporter, permease component                         | PF00528   | BPD_transp_1 |
| SFBM_0447                 | oligopeptide ABC transporter, ATPase subunit                             | PF00005   | ABC_tran     |
| SFBM_0448                 | oligopeptide ABC transporter, ATPase subunit                             | PF08352   | oligo_HPY    |
|                           |                                                                          | PF00005   | ABC_tran     |
| SFBM_0449                 | ABC transporter, extracellular solute-binding protein                    | PF08352   | oligo_HPY    |
|                           |                                                                          | PF00496   | SBP_bac_5    |
| SFBM_0450                 | ABC transporter, extracellular solute-binding protein                    | PF00496   | SBP_bac_5    |
| SFBM_0643                 | phosphonate ABC transporter, periplasmic phosphonate-binding protein     | no motif  |              |
| SFBM_0644                 | phosphonate ABC transporter, ATPase subunit                              | PF00005   | ABC_tran     |
| SFBM_0645                 | phosphonate ABC transporter, inner membrane subunit                      | PF00528   | BPD_transp_1 |
| SFBM_0646                 | phosphonate ABC transporter permease                                     | PF00528   | BPD_transp_1 |
| SFBM_0683                 | ABC-type sugar transport system                                          | PF00532   | Peripla_BP_1 |
| SFBM_0684                 | ribose ABC transporter, permease protein RbsC                            | PF02653   | BPD_transp_2 |
| SFBM_0685                 | ribose ABC transporter, ATP-binding protein, pseudogene                  | PF00005   | ABC_tran     |
| SFBM_0758                 | ABC transporter, ATP-binding protein                                     | PF00005   | ABC_tran     |
| SFBM_0786                 | sugar ABC transporter ATP-binding protein                                | PF00005   | ABC_tran     |
| SFBM_0789                 | ABC transporter, extracellular solute-binding protein                    | PF12010   | DUF3502      |
| SFBM_0791                 | sugar ABC transporter                                                    | PF00528   | BPD_transp_1 |
| SFBM_0792                 | ABC transporter                                                          | PF00528   | BPD_transp_1 |
| SFBM_0815                 | phosphate ABC transporter, regulatory protein PhoU                       | PF01895   | PhoU         |
| SFBM_0816                 | phosphate ABC transporter, ATPase component                              | PF00005   | ABC_tran     |
| SFBM_0817                 | phosphate ABC transporter, inner membrane subunit PstA                   | PF11812   | DUF3333      |
| SFBM_0818                 | phosphate ABC transporter, inner membrane subunit PstC                   | PF00528   | BPD_transp_1 |
|                           |                                                                          | PF00528   | BPD_transp_1 |
| SFBM_0819                 | phosphate ABC transporter, phosphate binding protein                     | PF11184   | DUF2969      |
| SFBM_0912                 | ABC transporter related protein                                          | PF00664   | ABC_membrane |
| SFBM_0913                 | ABC transporter related protein                                          | PF00005   | ABC_tran     |
|                           |                                                                          | PF00664   | ABC_membrane |
| SFBM_0989                 | iron compound ABC transporter, ATP-binding protein                       | PF00005   | ABC_tran     |
| SFBM_0990                 | iron compound ABC transporter, permease protein                          | PF01032   | FecCD        |
| SFBM_0991                 | ABC transporter, iron(III) dicitrate-binding periplasmic protein         | PF01497   | Peripla_BP_2 |
| SFBM_1086                 | ABC transporter related protein                                          | PF00005   | ABC_tran     |
| SFBM_1098                 | ABC transporter related protein                                          | PF00005   | ABC_tran     |
| SFBM_1139                 | ABC transporter ATP-binding protein                                      | PF00664   | ABC_membrane |
| SFBM_1140                 | iron compound ABC transporter, substrate-binding protein                 | PF00005   | ABC_tran     |
|                           |                                                                          | PF01497   | Peripla_BP_2 |
| SFBM_1141                 | ABC transporter, ATP-binding protein                                     | PF00005   | ABC_tran     |
| SFBM_1142                 | iron compound ABC transporter, permease protein                          | PF01032   | FecCD        |
| SFBM_1143                 | iron compound ABC transporter, permease protein                          | PF01032   | FecCD        |
| SFBM_1144                 | iron compound ABC transporter, iron compound-binding protein             | PF01497   | Peripla_BP_2 |
| SFBM_1145                 | ferrichrome ABC transporter, permease protein                            | PF01032   | FecCD        |
| SFBM_1146                 | ferrichrome ABC transporter, permease protein                            | PF01032   | FecCD        |
| SFBM_1147                 | ferrichrome ABC transporter, ATP-binding protein                         | PF00005   | ABC_tran     |
| SFBM_1148                 | ABC transporter, permease protein                                        | PF07690   | MFS_1        |
| SFBM_1193                 | ABC transporter related protein                                          | PF02463   | SMC_N        |
| SFBM_1365                 | cobalt ABC transporter, permease protein                                 | PF02361   | CbiQ         |
| SFBM_1366                 | cobalt ABC transporter, ATP-binding protein                              | PF00005   | ABC_tran     |
| SFBM_1367                 | cobalt ABC transporter protein CbiO                                      | PF00005   | ABC_tran     |
|                           |                                                                          | PF12370   | CoABC_C      |
| SFBM_1477                 | cobalt ABC transporter, ATP-binding protein                              | PF00005   | ABC_tran     |
| SFBM_1478                 | cobalt ABC transporter, permease                                         | PF12558   | DUF3744      |
|                           |                                                                          | PF02361   | CbiQ         |
| <b>2. PTS system</b>      |                                                                          |           |              |
| SFBM_0209                 | PTS system, mannitol-specific IIBC component                             | PF02302   | PTS_IIB      |
| SFBM_0345                 | PTS system, mannose-specific IIB component                               | PF02378   | PTS_EIIC     |
|                           |                                                                          | PF00359   | PTS_EIIA_2   |
| SFBM_0346                 | PTS system, mannose-specific IIC component                               | PF03609   | EII-Sor      |
| SFBM_0347                 | PTS system, mannose-specific IID component                               | PF03613   | EIID-AGA     |
| SFBM_0650                 | PTS system, IIBC component                                               | PF00359   | PTS_EIIA_2   |
|                           |                                                                          | PF02302   | PTS_IIB      |
|                           |                                                                          | PF02378   | PTS_EIIC     |

|                                      |                                                           |                               |                                    |
|--------------------------------------|-----------------------------------------------------------|-------------------------------|------------------------------------|
| SFBM_0696                            | PTS system, IIabc component                               | PF02378<br>PF00367<br>PF00358 | PTS_EIIC<br>PTS_EIIB<br>PTS_EIIA_1 |
| SFBM_0706                            | PTS system, beta-glucoside-specific IIABC component       | PF02378<br>PF00367<br>PF00358 | PTS_EIIC<br>PTS_EIIB<br>PTS_EIIA_1 |
| SFBM_0710                            | PTS system IIA component                                  | PF00359                       | PTS_EIIA_2                         |
| SFBM_0711                            | PTS system IIC component                                  | PF03611                       | EIIC-GAT                           |
| SFBM_0712                            | PTS system IIB component                                  | PF02302                       | PTS_IIB                            |
| SFBM_0966                            | PTS system, IIA component                                 | PF02255                       | PTS_IIA                            |
| SFBM_0998                            | PTS system, IIC component                                 | PF02378                       | PTS_EIIC                           |
| SFBM_0999                            | PTS system IIB component                                  | PF02302                       | PTS_IIB                            |
| SFBM_1004                            | PTS system IIB subunit                                    | PF02302                       | PTS_IIB                            |
| SFBM_1005                            | PTS system IIC subunit                                    | PF03611                       | EIIC-GAT                           |
| SFBM_1006                            | PTS system IIA subunit                                    | PF00359                       | PTS_EIIA_2                         |
| SFBM_1013                            | PTS system cellobiose-specific IIC component              | PF02378                       | PTS_EIIC                           |
| <b>3. MATE efflux family protein</b> |                                                           |                               |                                    |
| SFBM_0213                            | MATE efflux family protein                                | PF01554                       | MatE                               |
| SFBM_0516                            | MATE efflux family protein                                | PF01554                       | MatE                               |
| SFBM_1096                            | MATE efflux family protein                                | PF01554                       | MatE                               |
| SFBM_1157                            | MATE efflux family protein                                | PF01554                       | MatE                               |
| <b>4. Other transporter</b>          |                                                           |                               |                                    |
| SFBM_0022                            | chromate transporter                                      | PF02417                       | Chromate_transp                    |
| SFBM_0023                            | chromate transporter                                      | PF02417                       | Chromate_transp                    |
| SFBM_0341                            | magnesium and cobalt transporter                          | PF01544                       | CorA                               |
| SFBM_0357                            | transporter, major facilitator family                     | PF07690                       | MFS_1                              |
| SFBM_0552                            | amino acid permease-associated protein                    | PF00324                       | AA_permease                        |
| SFBM_0639                            | xanthine/uracil/vitamin C permease                        | PF00860                       | Xan_ur_permease                    |
| SFBM_0778                            | uracil permease                                           | PF00860                       | Xan_ur_permease                    |
| SFBM_0781                            | C4-dicarboxylate transporter/malic acid transport protein | PF03595                       | C4dic_mal_trans                    |
| SFBM_0964                            | sodium:dicarboxylate symporter family protein             | PF00375                       | SDF                                |
| SFBM_0993                            | putative transporter                                      | PF00892                       | EamA                               |
| SFBM_1016                            | sodium:dicarboxylate symporter family protein             | PF00375                       | SDF                                |
| SFBM_1022                            | putative transporter                                      | PF00496                       | SBP_bac_5                          |
| SFBM_1029                            | sodium/calcium exchanger protein                          | PF01699                       | Na_Ca_ex                           |
| SFBM_1215                            | ferrous iron transport protein A                          | PF04023                       | FeoA                               |
| SFBM_1216                            | ferrous iron transport protein B                          | PF02421<br>PF07670<br>PF07664 | FeoB_N<br>Gate<br>FeoB_C           |
| SFBM_1248                            | purine and pyrimidine permease                            | PF02133                       | Transp_cyt_pur                     |
| SFBM_1253                            | Na(+)/H(+) antiporter                                     | PF00999                       | Na_H_Exchange                      |
| SFBM_1310                            | magnesium transporter                                     | PF05239<br>PF03448<br>PF00571 | PRC<br>MgtE_N<br>CBS               |
| SFBM_1315                            | thiamin transport protein                                 | PF09515                       | Thia_YuaJ                          |
| SFBM_1346                            | aminobenzoyl-glutamate transport protein                  | PF03806                       | ABG_transport                      |
| SFBM_1426                            | magnesium and cobalt transporter                          | PF01544                       | CorA                               |
| SFBM_1468                            | putative transporter                                      | PF03180                       | Lipoprotein_9                      |

**Table S3. Predicted polysaccharide degradation and proteolytic activities in SFB**

| Gene name                         | Predicted function                                   | pfam motif                                     | PSORT prediction     |
|-----------------------------------|------------------------------------------------------|------------------------------------------------|----------------------|
| <b>Polysaccharide degradation</b> |                                                      |                                                |                      |
| SFBM_0066                         | $\alpha$ -N-acetylglucosaminidase family protein     | $\alpha$ -N-acetylglucosaminidase (NAGLU)      | Extracellular        |
| SFBM_0558                         | glycoside hydrolase                                  | Glycosyl hydrolase family 3 N terminal domain  | Cytoplasm            |
| SFBM_0697                         | $\beta$ -D-glucosidase                               | Glycosyl hydrolase family 1                    | Cytoplasm            |
| SFBM_0784                         | endo- $\beta$ -N-acetylglucosaminidase               | Glycosyl hydrolase family 85                   | Cytoplasmic membrane |
| SFBM_0790                         | $\alpha$ -mannosidase                                | Glycosyl hydrolase family 38 C-terminal domain | Cytoplasm            |
| SFBM_0797                         | $\alpha$ -glucosidase                                | Glycosyl hydrolase family 31                   | Cytoplasm            |
| SFBM_0996                         | $\beta$ -D-glucosidase                               | Glycosyl hydrolase family 1                    | Cytoplasm            |
| SFBM_1000                         | 6-phospho- $\beta$ -glucosidase                      | Family 4 glycosyl hydrolase                    | Cytoplasm            |
| <b>Proteolysis</b>                |                                                      |                                                |                      |
| SFBM_0069                         | Carboxyl-terminal protease                           | Peptidase family S41                           | Cytoplasmic membrane |
| SFBM_0156                         | Aminopeptidase                                       | Aminopeptidase I zinc metalloprotease (M18)    | Cytoplasm            |
| SFBM_0176                         | CAAX amino terminal protease family protein          |                                                | Cytoplasmic membrane |
| SFBM_0254                         | Xaa-pro aminopeptidase                               | Metallopeptidase family M24                    | Cytoplasm            |
| SFBM_0258                         | Aminoacyl-histidine dipeptidase                      | Peptidase family M20/M25/M40                   | Cytoplasm            |
| SFBM_0261                         | Amidohydrolase family protein                        | Amidohydrolase family                          | Cytoplasm            |
| SFBM_0280                         | O-sialoglycoprotein endopeptidase                    | Glycoprotease family                           | Cytoplasm            |
| SFBM_0282                         | Serine protease                                      | Trypsin                                        | Cytoplasmic membrane |
| SFBM_0299                         | Peptidase                                            | Peptidase family M23                           | Extracellular        |
| SFBM_0302                         | ATP-dependent Clp protease, proteolytic subunit ClpP | Clp protease                                   | Cytoplasmic membrane |
| SFBM_0303                         | ATP-dependent protease ATP-binding subunit ClpX      | AAA domain (Cdc48 subfamily)                   | Cytoplasmic membrane |
| SFBM_0311                         | Thermostable carboxypeptidase                        | Peptidase family M20/M25/M40                   | Cytoplasmic membrane |
| SFBM_0342                         | Aminopeptidase                                       | Aminopeptidase I zinc metalloprotease (M18)    | Cytoplasm            |
| SFBM_0421                         | Peptidase                                            |                                                | Cytoplasmic membrane |
| SFBM_0436                         | Aminopeptidase                                       | Peptidase family M28                           | Cytoplasmic membrane |
| SFBM_0470                         | Peptidase                                            | Peptidase family M23                           | Cytoplasmic membrane |
| SFBM_0522                         | U32 family peptidase                                 | Peptidase family U32                           | Cytoplasm            |
| SFBM_0724                         | Membrane-associated zinc metalloprotease             | Peptidase family M50                           | Cytoplasmic membrane |
| SFBM_0739                         | Clp protease                                         | Clp protease                                   | Cytoplasm            |
| SFBM_0812                         | Peptidase                                            | Peptidase family M28                           | Extracellular        |
| SFBM_0833                         | Peptidase                                            | Peptidase family U32                           | Cytoplasmic membrane |
| SFBM_0888                         | Serine protease                                      | Trypsin                                        | Extracellular        |
| SFBM_0903                         | Peptidase                                            | Insulinase (Peptidase family M16)              | Cytoplasm            |
| SFBM_0904                         | Peptidase                                            | Peptidase M16 inactive domain                  | Cytoplasm            |
| SFBM_1021                         | Peptidase                                            | Peptidase family M28                           | Cytoplasmic membrane |
| SFBM_1035                         | Subtilisin like protease                             | Subtilase family                               | Cytoplasmic membrane |
| SFBM_1063                         | Putative cysteine protease                           | Transglutaminase-like superfamily              | Cytoplasmic membrane |
| SFBM_1065                         | Peptidase                                            | Insulinase (Peptidase family M16)              | Cytoplasm            |
| SFBM_1260                         | Glycoprotease family protein                         | Glycoprotease family                           | Cytoplasm            |
| SFBM_1273                         | Peptidase                                            | Peptidase family M23                           | Extracellular        |
| SFBM_1325                         | Oligoendopeptidase F                                 | Peptidase family M3                            | Cytoplasm            |
| SFBM_1327                         | PepF/M3 family oligoendopeptidase                    | Peptidase family M3                            | Cytoplasmic membrane |
| SFBM_1358                         | isoaspartyl dipeptidase                              | Amidohydrolase family                          | Cytoplasm            |
| SFBM_1374                         | Methionine aminopeptidase                            | Metallopeptidase family M24                    | Cytoplasm            |
| SFBM_1427                         | LD-carboxypeptidase family protein                   | LD-carboxypeptidase                            | Cytoplasm            |
| SFBM_1430                         | ATP-dependent Clp protease, ATPase subunit           | AAA domain (Cdc48 subfamily)                   | Cytoplasm            |
| SFBM_1450                         | Serine protease                                      |                                                | Cytoplasmic membrane |
| SFBM_1459                         | Leucyl aminopeptidase                                | Cytosol aminopeptidase family, catalytic dom   | Cytoplasmic membrane |
| SFBM_1485                         | ATP-dependent protease                               | Lon protease (S16) C-terminal proteolytic do   | Cytoplasmic membrane |
| SFBM_1496                         | Subtilase family protein                             | Subtilase family                               | Cytoplasmic membrane |
| SFBM_1497                         | Peptidase                                            | Peptidase family M23                           | Cytoplasmic membrane |

**Table S4. The germination/sporulation-related genes and chemotaxis/motility-related genes in SFB**

| Gene ID            | Predicted function                                                                        | Pfam description (e-value <10 <sup>-8</sup> )              |
|--------------------|-------------------------------------------------------------------------------------------|------------------------------------------------------------|
| <b>Germination</b> |                                                                                           |                                                            |
| SFBM_0401          | spore cortex-lytic enzyme                                                                 | Putative peptidoglycan binding domain                      |
| SFBM_0605          | serine/threonine protein kinase PrkC                                                      | Protein kinase domain                                      |
| SFBM_0945          | spore protease                                                                            | Germination protease                                       |
| SFBM_0949          | stage V sporulation protein AE                                                            | SpoVA protein                                              |
| SFBM_0950          | stage V sporulation protein AD                                                            | Stage V sporulation protein AD (SpoVAD)                    |
| SFBM_0951          | stage V sporulation protein AC                                                            | SpoVA protein                                              |
| SFBM_1035          | serine protease Csp                                                                       | Subtilase family                                           |
| SFBM_1289          | spore germination protein GerAC                                                           | Spore germination B3/ GerAC like, C-terminal               |
| SFBM_1290          | spore germination protein GerAB                                                           | Spore germination protein                                  |
| SFBM_1291          | spore germination protein GerAA                                                           | Bacillus/Clostridium GerA spore germination protein        |
| SFBM_1470          | pre-pro-form spore cortex-lytic enzyme                                                    | Putative peptidoglycan binding domain                      |
| SFBM_1496          | serine protease Csp                                                                       | Subtilase family                                           |
| <b>Sporulation</b> |                                                                                           |                                                            |
| SFBM_0041          | AbrB family transcriptional regulator                                                     | SpoVT / AbrB like domain                                   |
| SFBM_0249          | spore maturation protein A                                                                | Nucleoside recognition                                     |
| SFBM_0250          | spore maturation protein B                                                                |                                                            |
| SFBM_0298          | small acid-soluble spore protein                                                          | Small, acid-soluble spore proteins, alpha/bet type         |
| SFBM_0313          | stage V sporulation protein B                                                             | Polysaccharide biosynthesis protein                        |
| SFBM_0314          | stage V sporulation protein B                                                             | Polysaccharide biosynthesis protein                        |
| SFBM_0471          | sporulation protein YtxC                                                                  | YtxC-like family                                           |
| SFBM_0490          | small acid-soluble spore protein                                                          | Small, acid-soluble spore proteins, alpha/beta type        |
| SFBM_0495          | CotS family spore coat protein                                                            | Phosphotransferase enzyme family                           |
| SFBM_0496          | spore coat protein                                                                        |                                                            |
| SFBM_0524          | sporulation protein YqfC                                                                  | YabP family                                                |
| SFBM_0525          | stage IV sporulation protein                                                              | Putative stage IV sporulation protein YqfD                 |
| SFBM_0534          | CotS family spore coat protein                                                            | Phosphotransferase enzyme family                           |
| SFBM_0588          | sporulation protein YtfJ                                                                  | Sporulation protein YtfJ (Spore_YtfJ)                      |
| SFBM_0632          | stage V sporulation protein S                                                             | Stage V sporulation protein S (SpoVS)                      |
| SFBM_0660          | stage IV sporulation protein B                                                            | SpoVB peptidase S55                                        |
| SFBM_0661          | sporulation transcription factor Spo0A                                                    | Sporulation initiation factor Spo0A C terminal             |
| SFBM_0737          | sporulation protein                                                                       |                                                            |
| SFBM_0740          | DNA translocase FtsK/SpoIIIE                                                              | FtsK/SpoIIIE family                                        |
| SFBM_0745          | stage V sporulation protein S                                                             | Stage V sporulation protein S (SpoVS)                      |
| SFBM_0809          | stage IV sporulation protein A                                                            | Stage IV sporulation protein A (spore_IV_A)                |
| SFBM_0825          | RNA polymerase sigma-G factor                                                             | Sigma-70 region 2                                          |
| SFBM_0826          | sporulation sigma factor SigE                                                             | Sigma-70 region 2                                          |
| SFBM_0827          | sporulation factor SpoIIIGA                                                               | Sporulation factor SpoIIIGA                                |
| SFBM_0828          | cell division protein FtsZ                                                                | Tubulin/FtsZ family, GTPase domain                         |
| SFBM_0831          | sporulation sigma factor SigK                                                             | Sigma-70, region 4                                         |
| SFBM_0896          | cell division protein FtsW                                                                | Cell cycle protein                                         |
| SFBM_0900          | stage V sporulation protein D                                                             | Penicillin binding protein transpeptidase domain           |
| SFBM_0944          | stage II sporulation protein P                                                            | Stage II sporulation protein P (SpoIIP)                    |
| SFBM_0969          | stage III sporulation protein AG                                                          |                                                            |
| SFBM_0970          | stage III sporulation protein AF                                                          | Stage III sporulation protein AF (Spore_III_AF)            |
| SFBM_0971          | stage III sporulation protein AE                                                          | Stage III sporulation protein AE (spore_III_AE)            |
| SFBM_0972          | stage III sporulation protein AD                                                          | Stage III sporulation protein AC/AD protein family         |
| SFBM_0973          | stage III sporulation protein AC                                                          | Stage III sporulation protein AC/AD protein family         |
| SFBM_0974          | stage III sporulation protein AB                                                          | Stage III sporulation protein AB (spore_III_AB)            |
| SFBM_0975          | stage III sporulation protein AA                                                          | Protein of unknown function, DUF265                        |
| SFBM_1017          | sporulation sigma factor SigF                                                             | Sigma-70 region 2                                          |
| SFBM_1018          | anti-sigma F factor                                                                       | Histidine kinase-, DNA gyrase B-, and HSP90-like A         |
| SFBM_1019          | anti-sigma factor antagonist                                                              | STAS domain                                                |
| SFBM_1127          | stage II sporulation protein M                                                            |                                                            |
| SFBM_1272          | sporulation transcriptional regulator spoIIID                                             | Stage III sporulation protein D                            |
| SFBM_1274          | stage II sporulation protein D                                                            | Stage II sporulation protein                               |
| SFBM_1288          | stage II sporulation protein R                                                            | Stage II sporulation protein R (spore_II_R)                |
| SFBM_1298          | sporulation peptidase YabG                                                                | YabG peptidase U57                                         |
| SFBM_1300          | spore coat protein                                                                        | Choline/ethanolamine kinase                                |
| SFBM_1437          | stage II sporulation protein E                                                            | Stage II sporulation protein E (SpoIIE)                    |
| SFBM_1440          | spore cortex biosynthesis protein                                                         | Spore cortex protein YabQ (Spore_YabQ)                     |
| SFBM_1441          | sporulation protein                                                                       | YabP family                                                |
| SFBM_1444          | stage V sporulation protein B                                                             | Polysaccharide biosynthesis protein                        |
| SFBM_1445          | stage V sporulation protein T                                                             | SpoVT / AbrB like domain                                   |
| SFBM_1458          | septation protein spoVG                                                                   | SpoVG                                                      |
| SFBM_1505          | sporulation initiation inhibitor protein Soj                                              | CobQ/CobB/MinD/ParA nucleotide binding domain              |
| SFBM_1506          | stage 0 sporulation protein J                                                             | ParB-like nuclease domain                                  |
| SFBM_1512          | stage III sporulation protein J                                                           | 60Kd inner membrane protein                                |
| <b>Chemotaxis</b>  |                                                                                           |                                                            |
| SFBM_0442          | methyl-accepting chemotaxis protein without membrane domain (probably intracellular type) | Methyl-accepting chemotaxis protein (MCP) signaling domain |
| SFBM_0564          | chemotaxis protein CheW                                                                   | CheW-like domain                                           |
| SFBM_0565          | chemoreceptor glutamine deamidase CheD                                                    | CheD                                                       |
| SFBM_0566          | protein-glutamate methyltransferase CheB                                                  | CheB methyltransferase                                     |
| SFBM_0567          | chemotaxis protein methyltransferase CheR                                                 | CheR methyltransferase, SAM binding domain                 |
| SFBM_0568          | chemotaxis protein CheA                                                                   | CheW-like domain                                           |
| SFBM_0569          | chemotaxis protein CheC                                                                   | CheC-like family                                           |
| SFBM_0570          | chemotaxis protein CheY                                                                   | Response regulator receiver domain                         |
| SFBM_0571          | chemotaxis signal transduction protein CheW                                               | CheW-like domain                                           |
| SFBM_1032          | methyl-accepting chemotaxis protein (chemotaxis sensory transducer)                       | Methyl-accepting chemotaxis protein (MCP) signaling domain |
| SFBM_1114          | chemotaxis protein MotB                                                                   | OmpA family                                                |
| SFBM_1115          | chemotaxis protein MotA                                                                   | MotA/TolQ/ExbB proton channel family                       |
| <b>Motility</b>    |                                                                                           |                                                            |
| SFBM_0572          | flagellar switch protein FliM                                                             | Flagellar motor switch protein FliM                        |
| SFBM_0573          | flagellar motor switch phosphatase FliY                                                   | CheC-like family                                           |
| SFBM_0574          | FigN family protein                                                                       | FigN protein                                               |

|           |                                                       |                                                           |
|-----------|-------------------------------------------------------|-----------------------------------------------------------|
| SFBM_0575 | flagellar hook-associated protein                     | Domain of unknown function (DUF1078)                      |
| SFBM_0576 | flagellar hook-associated protein                     | Bacterial flagellin N-terminal helical region             |
| SFBM_0577 | flagellar assembly protein FliW                       | FliW protein                                              |
| SFBM_0578 | carbon storage regulator                              | Global regulator protein family                           |
| SFBM_0579 | flagellar protein FliS                                | Flagellar protein FliS                                    |
| SFBM_0580 | flagellar hook-associated protein                     | Flagellar hook-associated protein 2 C-terminus            |
| SFBM_0582 | flagellar hook protein FlgE                           | Flagella basal body rod protein                           |
| SFBM_0583 | flagellin domain-containing protein FliC3             | Bacterial flagellin N-terminal helical region             |
| SFBM_0584 | flagellin domain-containing protein FliC4             | Bacterial flagellin N-terminal helical region             |
| SFBM_0642 | flagellin domain-containing protein FliC2             | Bacterial flagellin N-terminal helical region             |
| SFBM_0953 | flagellar FliD family protein                         | Flagellar protein (FliD)                                  |
| SFBM_0954 | flagellar hook assembly protein FlgD                  | Flagellar hook capping protein                            |
| SFBM_0955 | flagellar hook-length control protein FliK            | Flagellar hook-length control protein FliK                |
| SFBM_0956 | flagellar protein FliJ                                | Flagellar FliJ protein                                    |
| SFBM_0957 | flagellar protein export ATPase FliI                  | ATP synthase alpha/beta family, nucleotide-binding domain |
| SFBM_0958 | flagellar assembly protein FliH                       |                                                           |
| SFBM_0959 | flagellar motor switch protein FliG                   | FliG C-terminal domain                                    |
| SFBM_0960 | flagellar basal-body rod protein FlgC                 |                                                           |
| SFBM_0961 | flagellar basal-body rod protein FlgB                 |                                                           |
| SFBM_0962 | flagellin domain-containing protein FliC1             | Bacterial flagellin N-terminal helical region             |
| SFBM_1102 | flagellar basal body rod protein FlgG                 | Domain of unknown function (DUF1078)                      |
| SFBM_1103 | flagellar basal-body rod protein FlgG                 | Flagella basal body rod protein                           |
| SFBM_1105 | RNA polymerase sigma factor for flagellar operon fliA | Sigma-70, region 4                                        |
| SFBM_1107 | flagellar biosynthesis protein                        | SRP54-type protein, GTPase domain                         |
| SFBM_1108 | flagellar biosynthesis protein FliA                   | FHIPEP family                                             |
| SFBM_1109 | flagellar biosynthetic protein FliR/FliB              | FliB HrpN YscU SpaS Family                                |
| SFBM_1110 | flagellar biosynthetic protein FliQ                   | Bacterial export proteins, family 3                       |
| SFBM_1111 | flagellar biosynthetic protein FliP                   | FliP family                                               |
| SFBM_1112 | flagellar biosynthesis protein                        |                                                           |
| SFBM_1113 | flagellar basal body-associated protein               | Flagellar basal body-associated protein FliL              |
| SFBM_1316 | flagellar hook-basal body complex protein FliE        | Flagellar hook-basal body complex protein FliE            |
| SFBM_1317 | flagellar MS-ring protein FliF                        | Secretory protein of YscJ/FliF family                     |

**Table S5. Sensor kinases in SFB**

| <b>Gene name</b> | <b>Gene annotation</b>                        | <b>Cognate response regulator</b> | <b>Note</b>                |
|------------------|-----------------------------------------------|-----------------------------------|----------------------------|
| SFBM_0276        | sensor protein                                | SFBM_0275                         | no His kinase domain       |
| SFBM_0368        | two-component system, sensor histidine kinase | SFBM_0367                         |                            |
| SFBM_0465        | two-component sensor protein                  | SFBM_0464                         |                            |
| SFBM_0504        | histidine kinase                              | Orphan                            | PAS domain (E-value 0.15)  |
| SFBM_0568        | chemotaxis protein CheA                       | SFBM_0566<br>SFBM_0570            |                            |
| SFBM_0794        | sensor histidine kinase                       | SFBM_0793                         |                            |
| SFBM_0820        | phosphate regulon sensor protein              | SFBM_0821                         | PAS domain (E-value 0.034) |
| SFBM_1099        | two component sensor histidine kinase         | SFBM_1100                         |                            |
| SFBM_1134        | two-component sensor histidine kinase         | SFBM_1135                         |                            |
| SFBM_1451        | two component sensor histidine kinase         | SFBM_1452                         |                            |

Table S6. The 277 human gut metagenome sequence reads that are highly homologous to the mouse SFB genome sequence

| ID                                  | length | identity | difference of the BLAST bit score between the top (to SFB) and the second hits | position in the SFB genome sequence |        | CDS       |
|-------------------------------------|--------|----------|--------------------------------------------------------------------------------|-------------------------------------|--------|-----------|
|                                     |        |          |                                                                                |                                     |        |           |
| I85_1_FC30JGUAAXX:2:39:1519:918/1   | 44     | 95.24    | 11.9                                                                           | 29141                               | 29182  | SFBM_0021 |
| I77_1_FC30JKTAAXX:6:45:886:1975/1   | 44     | 97.73    | 15.9                                                                           | 29340                               | 29383  | SFBM_0021 |
| I77_1_FC30JKTAAXX:6:78:1609:1659/1  | 44     | 97.73    | 15.9                                                                           | 29340                               | 29383  | SFBM_0021 |
| I85_1_FC30JGUAAXX:7:74:674:47/1     | 44     | 97.73    | 15.9                                                                           | 29340                               | 29383  | SFBM_0021 |
| I85_1_FC30JGUAAXX:7:74:420:322/1    | 44     | 97.73    | 15.9                                                                           | 29341                               | 29384  | SFBM_0021 |
| I85_1_FC30JGUAAXX:8:88:373:634/1    | 44     | 95.24    | 7.9                                                                            | 29342                               | 29383  | SFBM_0021 |
| I360_1_FC30VNMAAXX:7:50:333:1378/1  | 45     | 97.67    | 13.9                                                                           | 29343                               | 29385  | SFBM_0021 |
| I85_1_FC30JGUAAXX:8:67:1134:257/2   | 44     | 95.24    | 29.7                                                                           | 29360                               | 29401  | SFBM_0021 |
| I77_1_FC30JKTAAXX:7:26:905:214/1    | 44     | 95.24    | 7.9                                                                            | 29383                               | 29342  | SFBM_0021 |
| I352_1_FC30DVNAAXX:1:82:80:1255/1   | 44     | 95.45    | 15.9                                                                           | 29406                               | 29363  | SFBM_0021 |
| I352_1_FC30DVNAAXX:6:43:818:1536/1  | 44     | 95.45    | 2                                                                              | 33450                               | 33493  | SFBM_0025 |
| I85_1_FC30JGUAAXX:7:48:365:242/2    | 44     | 95.35    | 8                                                                              | 87657                               | 87699  | SFBM_0071 |
| I352_1_FC30DVNAAXX:6:1:678:1742/1   | 44     | 95.24    | 7.9                                                                            | 87699                               | 87658  | SFBM_0071 |
| I352_1_FC30DVNAAXX:3:1:589:1015/2   | 44     | 100      | 4                                                                              | 90983                               | 91024  | SFBM_0072 |
| I361_2_FC30JAPAAXX:1:85:1094:125/1  | 44     | 100      | 4                                                                              | 90983                               | 91024  | SFBM_0072 |
| I358_1_FC30JBRAAXX:7:47:1118:1274/2 | 44     | 95.45    | 4                                                                              | 91031                               | 90988  | SFBM_0072 |
| I352_1_FC30DVNAAXX:4:39:425:870/1   | 44     | 95.24    | 13.9                                                                           | 210064                              | 210023 | SFBM_0194 |
| I361_2_FC30JAPAAXX:4:25:715:352/1   | 44     | 95.24    | 13.9                                                                           | 210064                              | 210023 | SFBM_0194 |
| I352_1_FC30DVNAAXX:8:50:49:1121/1   | 44     | 95.24    | 9.9                                                                            | 211972                              | 211931 | SFBM_0196 |
| I361_2_FC30JAPAAXX:1:95:591:1698/1  | 44     | 95.35    | 13.9                                                                           | 212350                              | 212392 | SFBM_0197 |
| I326_1_FC30GA4AAXX:1:54:1166:817/2  | 44     | 95.45    | 8                                                                              | 261022                              | 261065 | SFBM_0236 |
| I358_1_FC30JBRAAXX:7:60:893:374/2   | 44     | 95.24    | 4                                                                              | 272732                              | 272691 | SFBM_0247 |
| I330_1_FC30JM6AAXX:4:92:821:1784/2  | 44     | 95.45    | 15.9                                                                           | 273679                              | 273722 | SFBM_0247 |
| I361_1_FC30VWMAAXX:7:1:1587:1547/1  | 65     | 95.38    | 23.2                                                                           | 273717                              | 273781 | SFBM_0247 |
| I326_1_FC30VVEAAXX:5:51:1307:795/2  | 75     | 97.26    | 33.4                                                                           | 387338                              | 387410 | SFBM_0351 |
| I328_1_FC30MD2AAXX:6:60:46:594/2    | 75     | 97.3     | 33.4                                                                           | 387338                              | 387411 | SFBM_0351 |
| I328_3_FC30VVTAAAX:3:43:1789:1285/2 | 75     | 95.95    | 33.3                                                                           | 387338                              | 387411 | SFBM_0351 |
| I330_1_FC30MKYAAXX:3:63:1755:2028/2 | 75     | 97.33    | 35.4                                                                           | 387338                              | 387412 | SFBM_0351 |
| I85_2_FC30MG0AAXX:5:70:483:415/1    | 72     | 95.83    | 31.3                                                                           | 387339                              | 387410 | SFBM_0351 |
| I330_1_FC30W0RAAXX:4:74:945:212/1   | 75     | 97.33    | 37.4                                                                           | 387340                              | 387414 | SFBM_0351 |
| I361_1_FC30VWMAAXX:2:58:1725:1392/1 | 75     | 97.33    | 37.4                                                                           | 387340                              | 387414 | SFBM_0351 |
| I85_2_FC30MG0AAXX:4:34:1331:2036/2  | 75     | 97.33    | 37.4                                                                           | 387340                              | 387414 | SFBM_0351 |
| I85_1_FC30VW3AAXX:8:42:1637:1928/1  | 75     | 96       | 31.3                                                                           | 387345                              | 387419 | SFBM_0351 |
| I328_1_FC30DVI1AAXX:2:10:221:1734/2 | 75     | 96       | 31.3                                                                           | 387346                              | 387420 | SFBM_0351 |
| I330_1_FC30MKYAAXX:4:81:994:1321/2  | 75     | 95.83    | 25.3                                                                           | 387349                              | 387420 | SFBM_0351 |
| I85_2_FC30MG0AAXX:8:44:295:286/1    | 75     | 95.83    | 25.3                                                                           | 387349                              | 387420 | SFBM_0351 |
| I77_1_FC30JKTAAXX:7:19:298:1065/2   | 44     | 95.45    | 13.9                                                                           | 387383                              | 387426 | SFBM_0351 |
| I361_1_FC30VWMAAXX:2:59:17873/1     | 61     | 96.72    | 31.2                                                                           | 387401                              | 387411 | SFBM_0351 |
| I328_1_FC30MD2AAXX:5:75:1781:841/1  | 75     | 95.83    | 25.3                                                                           | 387409                              | 387338 | SFBM_0351 |
| I360_1_FC30NG5AAXX:2:47:149:71/2    | 75     | 97.33    | 35.4                                                                           | 387413                              | 387339 | SFBM_0351 |
| I326_1_FC30VVEAAXX:7:13:1466:923/1  | 75     | 97.22    | 33.3                                                                           | 387414                              | 387343 | SFBM_0351 |
| FC30Y35AAXX:2:81:1183:1049#0/1      | 71     | 95.77    | 43.2                                                                           | 387432                              | 387362 | SFBM_0351 |
| I85_1_FC30JGUAAXX:7:22:890:1508/1   | 44     | 95.24    | 17.8                                                                           | 387691                              | 387650 | SFBM_0351 |
| I358_1_FC30JBRAAXX:1:13:1741:807/1  | 44     | 95.35    | 19.8                                                                           | 387692                              | 387650 | SFBM_0351 |
| I85_1_FC30JGUAAXX:7:19:1070:1629/2  | 44     | 95.45    | 25.8                                                                           | 388075                              | 388118 | SFBM_0351 |
| I77_1_FC30JKTAAXX:6:43:1378:848/2   | 44     | 95.45    | 11.9                                                                           | 388091                              | 388134 | SFBM_0351 |
| I330_1_FC30JM6AAXX:4:78:1623:885/1  | 44     | 95.24    | 13.9                                                                           | 474016                              | 473975 | SFBM_0439 |
| I360_1_FC30VNMAAXX:7:35:1689:1644/1 | 45     | 95.45    | 8                                                                              | 475104                              | 475147 | SFBM_0441 |
| I77_1_FC30JKTAAXX:7:19:1335:490/2   | 44     | 97.73    | 6                                                                              | 475164                              | 475207 | SFBM_0441 |
| I361_2_FC30JAPAAXX:6:97:1599:629/1  | 44     | 95.45    | 8                                                                              | 481614                              | 481657 | SFBM_0447 |
| I352_1_FC30DVNAAXX:3:97:701:1677/1  | 44     | 95.35    | 13.9                                                                           | 481618                              | 481660 | SFBM_0447 |
| I361_2_FC30JAPAAXX:6:46:1053:491/1  | 44     | 95.24    | 11.9                                                                           | 481619                              | 481660 | SFBM_0447 |
| I352_1_FC30DVNAAXX:3:44:544:1567/1  | 44     | 95.24    | 2                                                                              | 481655                              | 481614 | SFBM_0447 |
| I352_1_FC30DVNAAXX:3:59:285:141/1   | 44     | 95.45    | 8                                                                              | 481657                              | 481614 | SFBM_0447 |
| I352_1_FC30DVNAAXX:2:74:253:1372/1  | 44     | 95.24    | 6                                                                              | 582874                              | 582833 | SFBM_0533 |
| I361_2_FC30JAPAAXX:7:38:805:337/2   | 44     | 95.35    | 9.9                                                                            | 583495                              | 583453 | SFBM_0533 |
| I358_1_FC30JBRAAXX:7:88:254:239/1   | 44     | 95.24    | 7.9                                                                            | 584478                              | 584519 | SFBM_0533 |
| I352_1_FC30DVNAAXX:6:69:1040:905/2  | 44     | 95.45    | 8                                                                              | 584521                              | 584478 | SFBM_0533 |
| I326_1_FC30VYFAAXX:5:40:243:1417/1  | 75     | 97.22    | 2                                                                              | 584867                              | 584796 | SFBM_0533 |
| I330_2_FC30VY5AAXX:4:33:830:1877/2  | 75     | 97.22    | 2                                                                              | 584867                              | 584796 | SFBM_0533 |
| I352_1_FC30DVNAAXX:3:38:436:1140/1  | 44     | 95.35    | 6                                                                              | 585015                              | 585057 | SFBM_0533 |
| I352_1_FC30DVNAAXX:3:35:1290:246/2  | 44     | 95.24    | 2                                                                              | 585056                              | 585015 | SFBM_0533 |
| I352_1_FC30DVNAAXX:1:86:168:905/1   | 44     | 95.35    | 25.8                                                                           | 588693                              | 588735 | SFBM_0536 |



|                                     |    |       |      |         |         |                                  |
|-------------------------------------|----|-------|------|---------|---------|----------------------------------|
| I326_1_FC30GA4AAXX:6:100:627:1912/2 | 44 | 97.62 | 7.9  | 588830  | 588871  | SFBM_0536                        |
| I358_1_FC30JBRAAXX:7:95:108:504/1   | 44 | 97.62 | 9.9  | 588830  | 588871  | SFBM_0536                        |
| I360_1_FC30VNMAAXX:5:52:1605:1974/1 | 45 | 95.56 | 3.9  | 588840  | 588884  | SFBM_0536                        |
| I77_1_FC30JKTAAXX:7:42:676:1034/2   | 44 | 95.35 | 6    | 589094  | 589136  | SFBM_0536                        |
| I354_1_FC30VGDAAXX:7:8:724:1987/1   | 75 | 95.95 | 19.4 | 592356  | 592429  | intergenic (SFBM_0540-SFBM_0541) |
| I85_1_FC30VW3AAXX:4:6:595:1210/1    | 66 | 96.92 | 23.2 | 592363  | 592427  | intergenic (SFBM_0540-SFBM_0541) |
| I85_1_FC30VW3AAXX:4:22:1719:1823/2  | 65 | 96.77 | 21.8 | 592368  | 592429  | intergenic (SFBM_0540-SFBM_0541) |
| I360_1_FC30VNMAAXX:8:50:256:1356/1  | 45 | 95.35 | 6    | 592585  | 592543  | intergenic (SFBM_0540-SFBM_0541) |
| I326_1_FC30GA4AAXX:6:39:974:764/1   | 44 | 97.67 | 13.9 | 702775  | 702733  | SFBM_0650                        |
| I352_1_FC30DVNAAXX:6:17:823:98/1    | 44 | 95.35 | 8    | 714256  | 714214  | SFBM_0663                        |
| I360_1_FC30VNMAAXX:5:92:1784:1712/1 | 45 | 97.67 | 7.9  | 773175  | 773217  | SFBM_0718                        |
| I360_1_FC30VNMAAXX:5:58:1200:1537/2 | 62 | 95.16 | 7.9  | 773176  | 773237  | SFBM_0718                        |
| I330_2_FC30VY5AAXX:3:94:1046:1598/1 | 62 | 95.16 | 2    | 773178  | 773239  | SFBM_0718                        |
| I360_1_FC30VNMAAXX:5:23:15:1683/2   | 60 | 96.67 | 7.4  | 773178  | 773237  | SFBM_0718                        |
| I358_1_FC30JBRAAXX:1:83:1584:162/1  | 44 | 95.45 | 2    | 773197  | 773240  | SFBM_0718                        |
| I352_1_FC30DVNAAXX:2:85:1323:1820/2 | 44 | 97.67 | 7.9  | 773217  | 773175  | SFBM_0718                        |
| I360_1_FC30VNMAAXX:5:49:556:779/1   | 45 | 95.56 | 7.9  | 773225  | 773181  | SFBM_0718                        |
| I361_2_FC30JAPAAXX:2:11:994:837/2   | 44 | 97.73 | 7.9  | 773225  | 773182  | SFBM_0718                        |
| I361_2_FC30JAPAAXX:7:19:710:1183/1  | 44 | 95.35 | 6    | 773228  | 773186  | SFBM_0718                        |
| I330_2_FC30VY5AAXX:6:62:1065:1523/2 | 61 | 98.28 | 6    | 773232  | 773175  | SFBM_0718                        |
| I352_1_FC30DVNAAXX:3:71:1753:767/2  | 44 | 95.45 | 2    | 773237  | 773194  | SFBM_0718                        |
| I85_1_FC30VW3AAXX:7:85:530:1311/1   | 75 | 100   | 4    | 773241  | 773169  | SFBM_0718                        |
| I330_2_FC30VY5AAXX:3:61:1458:949/1  | 66 | 95.31 | 3.4  | 773242  | 773179  | SFBM_0718                        |
| I330_2_FC30VY5AAXX:3:64:1481:676/2  | 71 | 95.59 | 2    | 773242  | 773175  | SFBM_0718                        |
| I77_1_FC30JKTAAXX:6:25:1069:99/1    | 44 | 95.24 | 2    | 775323  | 775364  | SFBM_0720                        |
| I361_2_FC30JAPAAXX:7:59:225:1027/1  | 44 | 95.24 | 11.9 | 775856  | 775897  | SFBM_0721                        |
| I330_2_FC30VY5AAXX:3:75:1720:1989/1 | 65 | 95.16 | 15.8 | 782613  | 782674  | SFBM_0726                        |
| I360_1_FC30VNMAAXX:5:45:1011:1115/1 | 45 | 95.56 | 9.9  | 782620  | 782664  | SFBM_0726                        |
| I360_1_FC30VNMAAXX:6:27:350:1585/1  | 45 | 97.73 | 21.8 | 801647  | 801690  | SFBM_0743                        |
| I360_1_FC30VNMAAXX:6:8:848:304/1    | 45 | 97.73 | 21.8 | 801690  | 801647  | SFBM_0743                        |
| I360_1_FC30VNMAAXX:8:67:1519:212/1  | 45 | 95.56 | 29.7 | 801748  | 801792  | SFBM_0743                        |
| I85_1_FC30JGUAAXX:8:17:1616:1857/2  | 44 | 95.35 | 4    | 862222  | 862264  | SFBM_0799                        |
| I360_1_FC30VNMAAXX:3:57:1234:564/1  | 45 | 97.78 | 19.9 | 862224  | 862268  | SFBM_0799                        |
| I326_1_FC30GA4AAXX:7:100:471:857/1  | 44 | 97.73 | 17.9 | 862267  | 862224  | SFBM_0799                        |
| I326_1_FC30GA4AAXX:7:23:760:132/1   | 44 | 95.24 | 11.9 | 868401  | 868442  | SFBM_0802                        |
| I77_1_FC30JKTAAXX:6:5:1329:1491/2   | 44 | 97.62 | 17.8 | 891685  | 891726  | SFBM_0825                        |
| I77_1_FC30JKTAAXX:6:22:108:1427/2   | 44 | 95.45 | 13.9 | 891736  | 891693  | SFBM_0825                        |
| I77_1_FC30JKTAAXX:6:65:216:1417/1   | 44 | 95.45 | 10   | 891738  | 891695  | SFBM_0825                        |
| I361_2_FC30JAPAAXX:2:91:1370:1511/2 | 44 | 97.73 | 29.7 | 892653  | 892610  | SFBM_0826                        |
| I326_1_FC30GA4AAXX:7:84:675:666/2   | 44 | 95.35 | 8    | 904143  | 904185  | SFBM_0837                        |
| I77_1_FC30JKTAAXX:8:40:845:78/1     | 44 | 95.35 | 9.9  | 904143  | 904185  | SFBM_0837                        |
| I361_2_FC30JAPAAXX:7:67:1717:1153/1 | 44 | 95.35 | 8    | 904185  | 904143  | SFBM_0837                        |
| I352_1_FC30DVNAAXX:8:22:516:67/1    | 44 | 95.24 | 13.9 | 912879  | 912920  | SFBM_0845                        |
| I361_2_FC30JAPAAXX:7:91:1192:787/1  | 44 | 95.24 | 4    | 917016  | 916975  | SFBM_0850                        |
| I352_1_FC30DVNAAXX:3:13:1544:365/2  | 44 | 97.73 | 7.9  | 921504  | 921547  | SFBM_0854                        |
| I358_1_FC30JBRAAXX:7:85:309:1767/1  | 44 | 97.73 | 4    | 924600  | 924643  | SFBM_0856                        |
| I85_1_FC30JGUAAXX:2:29:1498:687/1   | 44 | 95.35 | 11.9 | 978657  | 978615  | intergenic (SFBM_0911-SFBM_0912) |
| I354_1_FC30VGDAAXX:8:19:1588:637/1  | 75 | 97.33 | 17.9 | 1015071 | 1014997 | SFBM_0942                        |
| I352_1_FC30DVNAAXX:4:17:1051:1956/1 | 44 | 95.45 | 4    | 1015368 | 1015411 | SFBM_0942                        |
| I326_1_FC30GA4AAXX:2:86:885:1765/1  | 44 | 95.45 | 2    | 1015409 | 1015366 | SFBM_0942                        |
| I361_2_FC30JAPAAXX:4:60:192:830/1   | 44 | 97.67 | 4    | 1015415 | 1015373 | SFBM_0942                        |
| I352_1_FC30DVNAAXX:2:62:50:1823/1   | 44 | 95.24 | 2    | 1015418 | 1015377 | SFBM_0942                        |
| I85_1_FC30JGUAAXX:2:57:980:1757/2   | 44 | 100   | 15.8 | 1054442 | 1054399 | SFBM_0992                        |
| I77_1_FC30JKTAAXX:6:60:1511:1616/1  | 44 | 95.35 | 9.9  | 1108807 | 1108765 | SFBM_1036                        |
| I360_1_FC30VNMAAXX:8:15:1337:2000/1 | 45 | 95.56 | 7.9  | 1132574 | 1132530 | SFBM_1055                        |
| I326_1_FC30GA4AAXX:1:86:570:1746/1  | 44 | 95.24 | 4    | 1139207 | 1139248 | SFBM_1061                        |
| I326_1_FC30GA4AAXX:1:96:906:1044/1  | 44 | 97.62 | 3.9  | 1139207 | 1139248 | SFBM_1061                        |
| I330_1_FC30JM6AAXX:6:16:376:374/2   | 44 | 97.67 | 4    | 1139207 | 1139249 | SFBM_1061                        |
| I326_1_FC30GA4AAXX:1:17:1255:1719/2 | 44 | 97.73 | 2    | 1139208 | 1139251 | SFBM_1061                        |
| I330_1_FC30JM6AAXX:6:13:1335:859/1  | 44 | 97.73 | 2    | 1139208 | 1139251 | SFBM_1061                        |
| I326_1_FC30GA4AAXX:1:64:1605:316/1  | 44 | 97.62 | 3.9  | 1139248 | 1139207 | SFBM_1061                        |
| I330_1_FC30JM6AAXX:6:74:1741:1889/1 | 44 | 97.62 | 3.9  | 1139248 | 1139207 | SFBM_1061                        |
| I330_1_FC30JM6AAXX:6:88:633:31/2    | 44 | 97.67 | 4    | 1139249 | 1139207 | SFBM_1061                        |
| I326_1_FC30GA4AAXX:1:51:104:1046/1  | 44 | 97.73 | 4    | 1139250 | 1139207 | SFBM_1061                        |
| I326_1_FC30GA4AAXX:7:61:1506:1700/2 | 44 | 97.73 | 7.9  | 1145589 | 1145632 | SFBM_1067                        |
| I326_1_FC30GA4AAXX:1:1:1408:1617/1  | 44 | 97.62 | 7.9  | 1145829 | 1145788 | SFBM_1067                        |

|                                      |    |       |      |         |         |           |
|--------------------------------------|----|-------|------|---------|---------|-----------|
| I326_1_FC30GA4AAXX:1.95:1245:1447/1  | 44 | 97.62 | 7.9  | 1145829 | 1145788 | SFBM_1067 |
| I352_1_FC30DVNAAXX:6.97:1250:309/1   | 44 | 97.62 | 7.9  | 1145829 | 1145788 | SFBM_1067 |
| I85_1_FC30JGUAAXX:7.10:249:1425/2    | 44 | 97.62 | 7.9  | 1145829 | 1145788 | SFBM_1067 |
| I360_1_FC30VNMAAXX:8.70:1124:472/1   | 45 | 100   | 13.9 | 1145831 | 1145788 | SFBM_1067 |
| I354_1_FC30VW2AAXX:6.42:1716:278/2   | 75 | 96    | 8    | 1145863 | 1145789 | SFBM_1067 |
| I352_1_FC30DVNAAXX:7.42:789:1757/2   | 44 | 95.24 | 2    | 1246990 | 1247031 | SFBM_1156 |
| I361_2_FC30JAPAAXX:7.55:1311:1501/2  | 44 | 95.45 | 6    | 1247364 | 1247407 | SFBM_1156 |
| I80_1_FC30VGAAAXX:5.24:619:554/2     | 75 | 97.33 | 86.9 | 1260089 | 1260163 | SFBM_1170 |
| I352_2_FC30VYJAAXX:7.61:1227:1131/1  | 75 | 95.95 | 82.9 | 1260118 | 1260045 | SFBM_1170 |
| I80_1_FC30VGAAAXX:5.20:1172:1970/1   | 67 | 97.01 | 76.9 | 1260163 | 1260097 | SFBM_1170 |
| I321_1_FC30ML0AAXX:2.58:712:362/1    | 65 | 98.46 | 121  | 1260247 | 1260183 | SFBM_1170 |
| I326_1_FC30GA4AAXX:7.91:118:660/2    | 44 | 95.35 | 69.9 | 1262349 | 1262307 | SFBM_1173 |
| I352_1_FC30DVNAAXX:3.65:1012:633/1   | 44 | 95.24 | 27.8 | 1262887 | 1262846 | SFBM_1173 |
| I330_2_FC30VY5AAXX:6.1:1017:1849/2   | 75 | 97.22 | 80.9 | 1263261 | 1263190 | SFBM_1173 |
| I352_2_FC30VYJAAXX:4.64:381:769/2    | 68 | 95.59 | 70.9 | 1263317 | 1263384 | SFBM_1173 |
| I58_1_FC30VGCAAXX:3.2:307:613/1      | 70 | 95.52 | 68.9 | 1263317 | 1263383 | SFBM_1173 |
| I58_1_FC30VGCAAXX:4.14:1315:1987/1   | 66 | 95.38 | 64.9 | 1263344 | 1263408 | SFBM_1173 |
| I326_1_FC30MK7AAXX:5.7:1609:1320/1   | 62 | 95.16 | 59.5 | 1263345 | 1263406 | SFBM_1173 |
| I354_1_FC30VW2AAXX:7.89:1439:799/1   | 62 | 95.16 | 59.5 | 1263380 | 1263319 | SFBM_1173 |
| I80_1_FC30VGAAAXX:3.28:1071:208/2    | 70 | 95.59 | 70.9 | 1263392 | 1263325 | SFBM_1173 |
| I352_1_FC30DVNAAXX:3.57:1500:1706/2  | 44 | 95.24 | 27.8 | 1264325 | 1264366 | SFBM_1173 |
| I330_1_FC30JM6AAXX:4.55:1121:1227/2  | 44 | 97.73 | 17.9 | 1264992 | 1265035 | SFBM_1174 |
| I58_1_FC30DYKAAXX:1.41:706:530/1     | 75 | 95.83 | 6    | 1269378 | 1269307 | SFBM_1179 |
| I361_2_FC30JAPAAXX:4.25:216:1203/2   | 44 | 95.45 | 25.8 | 1283834 | 1283877 | SFBM_1192 |
| I77_1_FC30JKTAAXX:8.83:846:1694/1    | 44 | 95.35 | 23.8 | 1283835 | 1283877 | SFBM_1192 |
| I352_1_FC30DVNAAXX:6.66:1482:726/1   | 44 | 95.24 | 21.8 | 1283877 | 1283836 | SFBM_1192 |
| I361_2_FC30JAPAAXX:3.52:1115:1177/1  | 44 | 95.35 | 23.8 | 1283877 | 1283835 | SFBM_1192 |
| I352_1_FC30DVNAAXX:7.97:792:422/1    | 44 | 95.45 | 15.9 | 1365103 | 1365146 | SFBM_1263 |
| I352_1_FC30DVNAAXX:7.40:206:557/2    | 44 | 95.45 | 13.9 | 1365105 | 1365148 | SFBM_1263 |
| I361_2_FC30JAPAAXX:3.86:339:722/1    | 44 | 95.45 | 13.9 | 1365105 | 1365148 | SFBM_1263 |
| I361_2_FC30JAPAAXX:4.11:972:1102/2   | 44 | 95.45 | 13.9 | 1365105 | 1365148 | SFBM_1263 |
| I361_2_FC30JAPAAXX:4.75:154:510/1    | 44 | 95.45 | 13.9 | 1365105 | 1365148 | SFBM_1263 |
| I358_1_FC30JBRAAXX:7.89:464:670/1    | 44 | 95.24 | 11.9 | 1365143 | 1365102 | SFBM_1263 |
| I326_1_FC30GA4AAXX:6.34:278:93/1     | 44 | 95.45 | 15.9 | 1365146 | 1365103 | SFBM_1263 |
| I77_1_FC30JKTAAXX:8.40:1418:1344/2   | 44 | 95.35 | 9.9  | 1365148 | 1365106 | SFBM_1263 |
| I77_1_FC30JKTAAXX:7.48:244:73/1      | 44 | 97.62 | 11.9 | 1369065 | 1369106 | SFBM_1265 |
| I321_1_FC30VV6AAXX:2.68:492:827/2    | 75 | 95.83 | 12   | 1369612 | 1369683 | SFBM_1265 |
| I321_1_FC30VV6AAXX:6.34:1300:1615/1  | 75 | 95.83 | 74.9 | 1369612 | 1369683 | SFBM_1265 |
| I321_1_FC30VV6AAXX:6.34:1301:1613/1  | 64 | 96.83 | 64.9 | 1369612 | 1369674 | SFBM_1265 |
| I328_3_FC30VVTAAAXX:2.45:1706:1152/2 | 75 | 95.83 | 14   | 1369612 | 1369683 | SFBM_1265 |
| I328_3_FC30VVTAAAXX:2.71:205:584/2   | 75 | 95.83 | 12   | 1369612 | 1369683 | SFBM_1265 |
| I328_3_FC30VVTAAAXX:2.87:852:569/2   | 75 | 95.83 | 12   | 1369612 | 1369683 | SFBM_1265 |
| I330_1_FC30MKYAAXX:7.94:911:667/1    | 75 | 95.83 | 12   | 1369612 | 1369683 | SFBM_1265 |
| I330_2_FC30VY5AAXX:6.15:1622:795/1   | 75 | 95.83 | 12   | 1369612 | 1369683 | SFBM_1265 |
| I330_2_FC30VY5AAXX:6.21:1703:376/1   | 75 | 95.83 | 14   | 1369612 | 1369683 | SFBM_1265 |
| I352_1_FC30VWNAAXX:3.33:944:1089/2   | 75 | 95.83 | 14   | 1369612 | 1369683 | SFBM_1265 |
| I361_2_FC30W11AAXX:3.11:625:1674/1   | 74 | 97.18 | 80.9 | 1369612 | 1369682 | SFBM_1265 |
| I361_2_FC30W11AAXX:3.20:1135:1348/1  | 75 | 97.22 | 82.9 | 1369612 | 1369683 | SFBM_1265 |
| I361_2_FC30W11AAXX:3.37:1375:963/2   | 75 | 97.22 | 82.9 | 1369612 | 1369683 | SFBM_1265 |
| I361_2_FC30W11AAXX:3.43:796:194/2    | 75 | 97.22 | 82.9 | 1369612 | 1369683 | SFBM_1265 |
| I361_2_FC30W11AAXX:3.50:410:1324/1   | 75 | 97.22 | 82.9 | 1369612 | 1369683 | SFBM_1265 |
| I361_2_FC30W11AAXX:3.51:1728:246/2   | 75 | 97.22 | 82.9 | 1369612 | 1369683 | SFBM_1265 |
| I361_2_FC30W11AAXX:3.58:910:345/1    | 75 | 97.22 | 82.9 | 1369612 | 1369683 | SFBM_1265 |
| I361_2_FC30W11AAXX:3.84:1735:832/2   | 75 | 97.22 | 82.9 | 1369612 | 1369683 | SFBM_1265 |
| I361_2_FC30W11AAXX:3.84:343:847/2    | 75 | 97.22 | 82.9 | 1369612 | 1369683 | SFBM_1265 |
| I361_2_FC30W11AAXX:3.86:1082:2016/2  | 75 | 97.22 | 82.9 | 1369612 | 1369683 | SFBM_1265 |
| I361_2_FC30W11AAXX:5.10:412:1297/2   | 75 | 95.83 | 14   | 1369612 | 1369683 | SFBM_1265 |
| I321_1_FC30VV6AAXX:6.16:572:1900/1   | 66 | 96.88 | 23.3 | 1369617 | 1369680 | SFBM_1265 |
| I321_1_FC30VV6AAXX:6.6:1439:1339/1   | 61 | 98.36 | 68.9 | 1369618 | 1369678 | SFBM_1265 |
| I352_1_FC30DVNAAXX:8.67:1097:998/2   | 44 | 95.45 | 4    | 1369620 | 1369663 | SFBM_1265 |
| I352_1_FC30DVNAAXX:3.35:350:2017/1   | 44 | 95.24 | 29.7 | 1369653 | 1369612 | SFBM_1265 |
| I85_1_FC30JGUAAXX:7.100:675:1507/1   | 44 | 95.35 | 6    | 1369654 | 1369612 | SFBM_1265 |
| I352_1_FC30DVNAAXX:8.3:459:1254/2    | 44 | 95.45 | 4    | 1369663 | 1369620 | SFBM_1265 |
| I330_2_FC30VY5AAXX:2.55:1010:1552/1  | 67 | 95.38 | 66.8 | 1369676 | 1369612 | SFBM_1265 |
| I352_1_FC30DVNAAXX:8.97:556:1488/1   | 44 | 95.35 | 2    | 1369678 | 1369636 | SFBM_1265 |
| I321_1_FC30VV6AAXX:6.89:616:1688/1   | 75 | 97.22 | 82.9 | 1369683 | 1369612 | SFBM_1265 |

|                                     |    |       |      |         |         |           |
|-------------------------------------|----|-------|------|---------|---------|-----------|
| I361_2_FC30W11AAXX:3:31:106:228/2   | 75 | 97.22 | 82.9 | 1369683 | 1369612 | SFBM_1265 |
| I361_2_FC30W11AAXX:3:31:1717:1052/1 | 75 | 97.22 | 82.9 | 1369683 | 1369612 | SFBM_1265 |
| I58_1_FC30DYKAAXX:3:10:1639:1880/2  | 75 | 95.83 | 12   | 1369683 | 1369612 | SFBM_1265 |
| I85_1_FC30JGUAAAX:7:62:324:327/1    | 44 | 95.35 | 11.9 | 1390352 | 1390310 | SFBM_1285 |
| I361_2_FC30JAPAAXX:7:63:1549:1374/2 | 44 | 95.35 | 13.9 | 1467962 | 1468004 | SFBM_1344 |
| I352_1_FC30DVNAAXX:8:25:545:194/2   | 44 | 95.24 | 9.9  | 1472498 | 1472539 | SFBM_1348 |
| I85_1_FC30JGUAAAX:2:5:1598:1971/1   | 44 | 95.35 | 13.9 | 1499354 | 1499396 | SFBM_1390 |
| I77_1_FC30JKTAAXX:7:72:1714:1246/1  | 44 | 95.24 | 11.9 | 1499355 | 1499396 | SFBM_1390 |
| I85_1_FC30JGUAAAX:8:8:1451:429/1    | 44 | 95.24 | 11.9 | 1499355 | 1499396 | SFBM_1390 |
| I358_1_FC30JBRAAXX:1:30:1082:714/2  | 44 | 95.45 | 17.9 | 1499382 | 1499339 | SFBM_1390 |
| I77_1_FC30JKTAAXX:7:95:1660:775/1   | 44 | 95.45 | 13.9 | 1499384 | 1499341 | SFBM_1390 |
| I361_2_FC30JAPAAXX:8:29:850:535/2   | 44 | 95.35 | 13.9 | 1499396 | 1499354 | SFBM_1390 |
| I358_1_FC30JBRAAXX:1:86:945:237/2   | 44 | 100   | 23.8 | 1500429 | 1500470 | SFBM_1392 |
| I361_2_FC30JAPAAXX:7:98:1025:1790/2 | 44 | 95.45 | 8    | 1500430 | 1500473 | SFBM_1392 |
| I85_1_FC30JGUAAAX:1:8:1054:313/1    | 44 | 100   | 13.9 | 1500434 | 1500475 | SFBM_1392 |
| I352_1_FC30DVNAAXX:2:50:1570:560/1  | 44 | 95.24 | 2    | 1500440 | 1500481 | SFBM_1392 |
| I85_1_FC30JGUAAAX:1:55:355:2006/2   | 44 | 100   | 23.8 | 1500474 | 1500431 | SFBM_1392 |
| I77_1_FC30JKTAAXX:7:30:272:1004/1   | 44 | 95.24 | 11.9 | 1503274 | 1503233 | SFBM_1397 |
| I352_1_FC30DVNAAXX:7:94:87:1510/2   | 44 | 95.35 | 17.9 | 1510347 | 1510389 | SFBM_1402 |
| I361_2_FC30JAPAAXX:2:57:925:904/2   | 44 | 97.73 | 23.8 | 1510392 | 1510349 | SFBM_1402 |
| I352_1_FC30DVNAAXX:8:58:1223:1006/1 | 44 | 97.62 | 3.9  | 1510847 | 1510888 | SFBM_1402 |
| I361_2_FC30JAPAAXX:1:70:1362:1403/1 | 44 | 97.62 | 3.9  | 1510847 | 1510888 | SFBM_1402 |
| I361_2_FC30JAPAAXX:2:8:780:1293/1   | 44 | 97.67 | 4    | 1510887 | 1510845 | SFBM_1402 |
| I360_1_FC30VNMAAXX:5:84:1294:571/1  | 45 | 97.73 | 6    | 1510888 | 1510845 | SFBM_1402 |
| I328_1_FC30MD2AAXX:6:64:942:273/1   | 75 | 95.95 | 22   | 1511454 | 1511527 | SFBM_1402 |
| I361_2_FC30JAPAAXX:7:47:1033:388/1  | 44 | 95.35 | 6    | 1511508 | 1511550 | SFBM_1402 |
| I352_1_FC30DVNAAXX:6:95:865:1649/2  | 44 | 95.45 | 6    | 1512570 | 1512613 | SFBM_1403 |
| I361_2_FC30JAPAAXX:2:25:262:825/1   | 44 | 95.45 | 13.9 | 1512748 | 1512791 | SFBM_1403 |
| I361_2_FC30JAPAAXX:2:23:817:1474/1  | 44 | 95.45 | 15.9 | 1512752 | 1512795 | SFBM_1403 |
| I358_1_FC30JBRAAXX:8:42:471:1625/1  | 44 | 95.35 | 6    | 1512785 | 1512743 | SFBM_1403 |
| I361_2_FC30JAPAAXX:4:2:514:1349/2   | 44 | 95.24 | 9.9  | 1512808 | 1512767 | SFBM_1403 |
| I352_1_FC30DVNAAXX:6:79:1391:441/1  | 44 | 95.35 | 27.8 | 1515223 | 1515265 | SFBM_1403 |
| I77_1_FC30JKTAAXX:6:88:902:1981/1   | 44 | 95.35 | 27.8 | 1515223 | 1515265 | SFBM_1403 |
| I352_1_FC30DVNAAXX:6:25:119:230/1   | 44 | 95.24 | 23.8 | 1515264 | 1515223 | SFBM_1403 |
| I352_1_FC30DVNAAXX:6:99:1681:1565/2 | 44 | 95.35 | 27.8 | 1515265 | 1515223 | SFBM_1403 |
| I361_2_FC30JAPAAXX:7:73:639:197/2   | 44 | 95.35 | 4    | 1516967 | 1517009 | SFBM_1406 |
| I77_1_FC30JKTAAXX:8:5:1084:269/2    | 44 | 95.35 | 4    | 1517009 | 1516967 | SFBM_1406 |
| I358_1_FC30JBRAAXX:7:50:1348:995/2  | 44 | 95.45 | 13.9 | 1517789 | 1517746 | SFBM_1407 |
| I352_1_FC30DVNAAXX:3:80:548:1597/1  | 44 | 95.35 | 6    | 1525538 | 1525580 | SFBM_1418 |
| I358_1_FC30JBRAAXX:8:88:1260:59/1   | 44 | 95.35 | 6    | 1525538 | 1525580 | SFBM_1418 |
| I326_1_FC30GA4AAXX:2:90:1085:617/1  | 44 | 95.24 | 6    | 1525580 | 1525539 | SFBM_1418 |
| I77_1_FC30JKTAAXX:8:44:22:600/1     | 44 | 95.35 | 6    | 1525580 | 1525538 | SFBM_1418 |
| I352_1_FC30DVNAAXX:3:67:853:191/1   | 44 | 95.24 | 4    | 1537383 | 1537342 | SFBM_1429 |
| I330_1_FC30JM6AAXX:6:65:884:734/1   | 44 | 95.24 | 11.9 | 1537429 | 1537470 | SFBM_1429 |
| I352_1_FC30DVNAAXX:8:69:1096:1117/2 | 44 | 95.24 | 4    | 1537529 | 1537488 | SFBM_1429 |
| I358_1_FC30JBRAAXX:1:34:629:1822/2  | 44 | 95.35 | 4    | 1543440 | 1543482 | SFBM_1434 |
| I85_1_FC30JGUAAAX:1:79:141:116/2    | 44 | 95.45 | 4    | 1543440 | 1543483 | SFBM_1434 |
| I85_1_FC30JGUAAAX:1:96:1355:911/1   | 44 | 95.45 | 4    | 1543440 | 1543483 | SFBM_1434 |
| I85_1_FC30JGUAAAX:1:51:717:304/1    | 44 | 95.35 | 2    | 1543442 | 1543484 | SFBM_1434 |
| I85_1_FC30JGUAAAX:1:86:829:1245/1   | 44 | 95.45 | 4    | 1543483 | 1543440 | SFBM_1434 |
| I358_1_FC30JBRAAXX:1:53:1000:632/2  | 44 | 95.35 | 2    | 1543484 | 1543442 | SFBM_1434 |
| I358_1_FC30JBRAAXX:1:53:1128:1291/1 | 44 | 95.45 | 4    | 1543484 | 1543441 | SFBM_1434 |
| I358_1_FC30JBRAAXX:1:54:1290:218/2  | 44 | 95.35 | 2    | 1543484 | 1543442 | SFBM_1434 |
| I85_1_FC30JGUAAAX:1:46:503:1653/1   | 44 | 95.35 | 2    | 1543484 | 1543442 | SFBM_1434 |
| I358_1_FC30JBRAAXX:1:34:1026:219/2  | 44 | 95.35 | 6    | 1543502 | 1543544 | SFBM_1434 |
| I358_1_FC30JBRAAXX:1:92:354:353/2   | 44 | 95.45 | 8    | 1543502 | 1543545 | SFBM_1434 |
| I85_1_FC30JGUAAAX:1:37:1529:1288/1  | 44 | 95.45 | 8    | 1543502 | 1543545 | SFBM_1434 |
| I85_1_FC30JGUAAAX:1:49:672:371/2    | 44 | 95.35 | 6    | 1543502 | 1543544 | SFBM_1434 |
| I85_1_FC30JGUAAAX:1:84:186:1843/1   | 44 | 95.45 | 8    | 1543502 | 1543545 | SFBM_1434 |
| I85_1_FC30JGUAAAX:1:92:1288:1448/1  | 44 | 95.45 | 8    | 1543502 | 1543545 | SFBM_1434 |
| I358_1_FC30JBRAAXX:1:40:1507:492/2  | 44 | 95.45 | 8    | 1543503 | 1543546 | SFBM_1434 |
| I358_1_FC30JBRAAXX:1:67:834:1590/1  | 44 | 95.35 | 6    | 1543504 | 1543546 | SFBM_1434 |
| I85_1_FC30JGUAAAX:1:30:35:1907/2    | 44 | 95.35 | 6    | 1543504 | 1543546 | SFBM_1434 |
| I85_1_FC30JGUAAAX:1:38:1581:116/2   | 44 | 95.24 | 4    | 1543505 | 1543546 | SFBM_1434 |
| I85_1_FC30JGUAAAX:1:64:151:825/1    | 44 | 95.24 | 4    | 1543505 | 1543546 | SFBM_1434 |
| I361_2_FC30JAPAAXX:2:94:1311:603/2  | 44 | 95.45 | 8    | 1543529 | 1543486 | SFBM_1434 |

|                                     |    |       |      |         |         |                                  |
|-------------------------------------|----|-------|------|---------|---------|----------------------------------|
| I85_1_FC30JGUAAXX:1:39:1329:744/1   | 44 | 95.35 | 4    | 1543544 | 1543502 | SFBM_1434                        |
| I85_1_FC30JGUAAXX:1:52:701:1206/1   | 44 | 95.45 | 8    | 1543545 | 1543502 | SFBM_1434                        |
| I358_1_FC30JBRAAXX:1:3:1045:1379/1  | 44 | 95.24 | 4    | 1543546 | 1543505 | SFBM_1434                        |
| I358_1_FC30JBRAAXX:1:3:437:935/2    | 44 | 95.24 | 4    | 1543546 | 1543505 | SFBM_1434                        |
| I358_1_FC30JBRAAXX:1:37:196:1298/1  | 44 | 95.24 | 4    | 1543546 | 1543505 | SFBM_1434                        |
| I358_1_FC30JBRAAXX:1:62:1047:1594/1 | 44 | 95.24 | 4    | 1543546 | 1543505 | SFBM_1434                        |
| I85_1_FC30JGUAAXX:1:18:1619:1804/1  | 44 | 95.45 | 8    | 1543546 | 1543503 | SFBM_1434                        |
| I85_1_FC30JGUAAXX:1:80:1411:655/1   | 44 | 95.45 | 8    | 1543546 | 1543503 | SFBM_1434                        |
| I361_2_FC30W11AAXX:3:70:526:688/1   | 60 | 95    | 7.9  | 1543595 | 1543654 | SFBM_1434                        |
| I85_1_FC30JGUAAXX:8:68:1302:1741/1  | 44 | 97.62 | 3.9  | 1543613 | 1543654 | SFBM_1434                        |
| I352_1_FC30DVNAAXX:7:47:1734:1771/1 | 44 | 95.35 | 8    | 1543668 | 1543626 | SFBM_1434                        |
| I330_2_FC30VY5AAXX:8:17:1503:1202/1 | 64 | 95.16 | 13.9 | 1557326 | 1557387 | SFBM_1448                        |
| I360_1_FC30VNMAAXX:7:1:98:545/1     | 45 | 95.35 | 2    | 1566739 | 1566697 | SFBM_1455                        |
| I358_1_FC30VV9AAXX:6:35:1459:1574/1 | 75 | 96    | 2    | 1577387 | 1577313 | intergenic (SFBM_1465-SFBM_1466) |
| I360_1_FC30VNMAAXX:7:70:749:1162/1  | 45 | 97.73 | 39.7 | 1578184 | 1578227 | SFBM_1466                        |
| I361_2_FC30JAPAAXX:4:77:1611:1829/2 | 44 | 95.24 | 6    | 1615296 | 1615337 | SFBM_1510                        |
